# Supplementary material for: Association Between Passive Smoking and the Risk of Cervical Intraepithelial Neoplasia 1 in Korean Women
Source: PubMed Central journal article supplement (PMC5742379; doi:10.2188/jea.je20160118), 2018-01-05
Supplement: je-28-048-s001.pdf [file je-28-048-s001.pdf]

1 **eTable 1.** The effect of interaction of smoking and passive smoking on CIN risk

|                                  | CIN1                       |                              | CIN 2/3                    |                              | Cervical cancer            |                              |
|----------------------------------|----------------------------|------------------------------|----------------------------|------------------------------|----------------------------|------------------------------|
|                                  | Univariable<br>OR (95% CI) | Multivariable<br>OR (95% CI) | Univariable<br>OR (95% CI) | Multivariable<br>OR (95% CI) | Univariable<br>OR (95% CI) | Multivariable<br>OR (95% CI) |
| <b>Passive smoking</b>           | 1.34 (0.98–1.83)           | 1.38 (0.93–2.05)             | 1.67 (1.14–2.45)           | 1.44 (0.88–2.38)             | 1.15 (0.77–1.71)           | 1.11 (0.52–2.37)             |
| <b>Smoking</b>                   | 2.33 (1.24–4.41)           | 1.60 (0.70–3.65)             | 2.67 (1.26–5.67)           | 1.45 (0.55–3.83)             | 0.80 (0.27–2.40)           | 1.65 (0.28–9.75)             |
| <b>Smoking + Passive smoking</b> | 1.89 (1.14–3.09)           | 1.16 (0.61–2.22)             | 1.94 (1.04–3.59)           | 0.98 (0.41–2.35)             | 1.23 (0.62–2.45)           | 1.90 (0.43–8.40)             |
| <i>P</i> for interaction term    | 0.221                      | 0.230                        | 0.097                      | 0.235                        | 0.665                      | 0.235                        |

2 CI, confidence interval; CIN, low-grade cervical intraepithelial neoplasia; OR, odds ratio.

3 The logistic regression analysis was adjusted for age, parity, oral contraceptive use, menopausal status, and oncogenic-HPV infection status.

4 Interaction term = Passive smoking status \* smoking status

5

6

7 **eTable 2.** The effect of interaction of passive smoking and oncogenic HPV infection on CIN risk

|                               | CIN 1                                   |                                           | CIN 2/3                                 |                                           | Cervical cancer                         |                                           |
|-------------------------------|-----------------------------------------|-------------------------------------------|-----------------------------------------|-------------------------------------------|-----------------------------------------|-------------------------------------------|
|                               | Univariable<br>OR (95% CI) <sup>b</sup> | Multivariable<br>OR (95% CI) <sup>c</sup> | Univariable<br>OR (95% CI) <sup>b</sup> | Multivariable<br>OR (95% CI) <sup>c</sup> | Univariable<br>OR (95% CI) <sup>b</sup> | Multivariable<br>OR (95% CI) <sup>c</sup> |
| <b>Passive smoking</b>        | 1.37 (0.83–2.26)                        | 1.23 (0.73–2.07)                          | 0.90 (0.51–1.59)                        | 0.79 (0.44–1.43)                          | –                                       | –                                         |
| <b>HPV infection</b>          | 4.72 (3.26–6.82)                        | 4.94 (3.37–7.24)                          | 1.64 (1.05–2.56)                        | 1.69 (1.07–2.68)                          | –                                       | –                                         |
| <b>Passive + HPV</b>          | 6.93 (4.57–10.5)                        | 5.75 (3.72–8.89)                          | 2.58 (1.58–4.23)                        | 2.20 (1.31–3.68)                          |                                         |                                           |
| <i>P</i> for interaction term | 0.259                                   | 0.746                                     | 0.301                                   | 0.786                                     |                                         |                                           |

8 CI, confidence interval; CIN, low-grade cervical intraepithelial neoplasia; OR, odds ratio.

9 The logistic regression analysis was adjusted for age, parity, oral contraceptive use, menopausal status, and smoking status.

10 Interaction term = Passive smoking status \* Oncogenic-HPV infection status

11
